# Supplementary material for: Wine Yeasts Selection: Laboratory Characterization and Protocol Review
Source: MDPI journal article supplement (doi:10.3390/microorganisms9112223), 2021-10-26
Supplement: s1 [file s1]

# Supplementary Materials

**Table S1.** Volatile organic compounds of the wines with SO<sub>2</sub> produced using the eleven yeast strains.

| Compound                     | Peak area %*                    |                                 |                                 |                                  |                            |                                  |                                   |                             |                                   |                             |                           | Un-inoculated |
|------------------------------|---------------------------------|---------------------------------|---------------------------------|----------------------------------|----------------------------|----------------------------------|-----------------------------------|-----------------------------|-----------------------------------|-----------------------------|---------------------------|---------------|
|                              | <i>T. delbrueckii</i><br>3-16-1 | <i>M. bicuspidata</i><br>125/14 | <i>M. pulcherrima</i><br>11-1-7 | <i>S. cerevisiae</i><br>15-1-552 | <i>S. cerevisiae</i><br>53 | <i>S. cerevisiae</i><br>PDA W 10 | <i>S. cerevisiae</i><br>PDA M 1/1 | <i>D. hansenii</i><br>5-1-6 | <i>L. thermotolerans</i><br>5-1-1 | <i>Z. bailii</i><br>24-1-25 | <i>H. uvarum</i><br>26/17 |               |
| Acetaldehyde                 | 0.84                            | 0.76                            | 0.00                            | 1.29                             | 2.03                       | 1.16                             | 0.99                              | 0.00                        | 0.33                              | 0.54                        | 0.24                      | 0.00          |
| 1-Propanol                   | 0.00                            | 0.00                            | 0.00                            | 0.00                             | 0.00                       | 0.00                             | 0.00                              | 0.00                        | 0.00                              | 0.63                        | 0.00                      | 0.00          |
| Isobutanol                   | 0.00                            | 0.00                            | 0.23                            | 0.00                             | 0.00                       | 0.00                             | 0.00                              | 0.00                        | 0.00                              | 0.00                        | 0.00                      | 0.00          |
| 3-Methyl-1-butanol           | 6.21                            | 7.14                            | 5.33                            | 7.86                             | 12.29                      | 14.60                            | 11.38                             | 1.01                        | 12.27                             | 4.23                        | 1.28                      | 0.00          |
| Ethyl hexanoate              | 0.00                            | 0.48                            | 0.00                            | 0.36                             | 0.00                       | 0.94                             | 0.90                              | 0.00                        | 0.36                              | 0.00                        | 0.00                      | 0.00          |
| Hydroxyacetone               | 0.18                            | 0.00                            | 0.36                            | 0.00                             | 0.00                       | 0.00                             | 0.00                              | 0.61                        | 0.16                              | 0.49                        | 0.37                      | 0.50          |
| Acetoin                      | 0.00                            | 0.00                            | 0.00                            | 0.00                             | 0.00                       | 0.00                             | 0.00                              | 0.00                        | 0.00                              | 0.58                        | 1.44                      | 0.00          |
| 1-Hexanol                    | 0.00                            | 0.00                            | 0.20                            | 0.00                             | 0.00                       | 0.00                             | 0.00                              | 0.68                        | 0.00                              | 0.00                        | 0.00                      | 0.42          |
| Ethyl octanoate              | 0.00                            | 0.46                            | 0.00                            | 1.03                             | 0.00                       | 2.10                             | 1.25                              | 0.00                        | 0.00                              | 0.00                        | 0.00                      | 0.00          |
| Acetic acid                  | 3.12                            | 7.05                            | 3.25                            | 7.92                             | 12.02                      | 7.32                             | 9.42                              | 5.85                        | 3.77                              | 5.87                        | 12.01                     | 4.49          |
| Furfural                     | 3.49                            | 0.59                            | 6.26                            | 0.52                             | 0.44                       | 0.00                             | 0.28                              | 8.17                        | 0.98                              | 4.12                        | 6.16                      | 10.15         |
| 2-Hydroxyfuranol             | 0.36                            | 0.00                            | 0.65                            | 0.00                             | 0.00                       | 0.00                             | 0.00                              | 0.99                        | 0.00                              | 0.71                        | 0.84                      | 0.00          |
| 2,3-Butanediol               | 2.33                            | 2.44                            | 0.00                            | 3.85                             | 5.54                       | 2.23                             | 3.12                              | 0.00                        | 2.86                              | 1.03                        | 0.00                      | 0.00          |
| 5-Methylfurfural             | 0.72                            | 0.38                            | 0.75                            | 0.47                             | 0.48                       | 0.45                             | 0.46                              | 1.03                        | 0.54                              | 0.82                        | 0.89                      | 0.00          |
| Ethyl decanoate              | 0.00                            | 0.33                            | 0.00                            | 0.36                             | 0.00                       | 0.71                             | 0.47                              | 0.00                        | 0.00                              | 0.00                        | 0.00                      | 0.00          |
| 2-Furanmethanol              | 0.76                            | 0.14                            | 1.25                            | 0.00                             | 0.00                       | 0.00                             | 0.18                              | 2.03                        | 0.48                              | 1.30                        | 1.22                      | 1.53          |
| Ethyl 9-decenoate            | 0.00                            | 0.00                            | 0.00                            | 0.00                             | 0.00                       | 0.30                             | 0.00                              | 0.00                        | 0.00                              | 0.00                        | 0.00                      | 0.00          |
| Phenylethyl acetate          | 0.00                            | 0.23                            | 0.00                            | 0.35                             | 0.48                       | 0.40                             | 0.27                              | 0.00                        | 0.00                              | 1.46                        | 0.21                      | 0.00          |
| Benzyl alcohol               | 0.00                            | 0.00                            | 0.14                            | 0.00                             | 0.00                       | 0.00                             | 0.00                              | 0.38                        | 0.00                              | 0.00                        | 0.00                      | 0.19          |
| 2-Phenylethanol              | 10.32                           | 11.14                           | 7.10                            | 15.36                            | 17.03                      | 17.71                            | 12.31                             | 1.23                        | 22.37                             | 8.42                        | 4.71                      | 0.43          |
| Furyl hydroxymethylketone    | 0.60                            | 0.00                            | 0.47                            | 0.00                             | 0.00                       | 0.00                             | 0.00                              | 0.95                        | 0.00                              | 0.54                        | 0.81                      | 0.00          |
| Octanoic acid                | 0.00                            | 1.18                            | 0.00                            | 2.22                             | 0.27                       | 3.81                             | 2.31                              | 0.00                        | 0.30                              | 0.09                        | 0.37                      | 0.00          |
| 4-Vinylguaiacol              | 0.00                            | 0.57                            | 0.00                            | 0.73                             | 0.00                       | 0.84                             | 0.75                              | 1.38                        | 0.00                              | 0.00                        | 0.00                      | 0.00          |
| Decanoic acid                | 0.32                            | 3.89                            | 0.00                            | 5.69                             | 0.37                       | 7.16                             | 5.67                              | 0.00                        | 0.84                              | 0.00                        | 0.45                      | 0.11          |
| Pyranone                     | 8.41                            | 1.54                            | 9.05                            | 1.55                             | 0.89                       | 0.40                             | 0.60                              | 12.77                       | 4.51                              | 8.79                        | 9.74                      | 14.07         |
| Hydroxymaltol                | 0.38                            | 0.00                            | 0.60                            | 0.00                             | 0.00                       | 0.00                             | 0.00                              | 0.80                        | 0.00                              | 1.29                        | 1.00                      | 0.93          |
| 9-Decenoic acid              | 0.00                            | 2.13                            | 0.00                            | 2.84                             | 0.00                       | 4.29                             | 3.08                              | 0.00                        | 0.00                              | 0.00                        | 0.00                      | 0.00          |
| Coumaran                     | 0.00                            | 0.90                            | 0.00                            | 1.73                             | 1.64                       | 2.02                             | 1.43                              | 1.59                        | 0.00                              | 0.21                        | 0.19                      | 0.00          |
| Dodecanoic acid              | 0.00                            | 0.00                            | 0.00                            | 0.69                             | 0.43                       | 0.00                             | 0.44                              | 0.49                        | 0.32                              | 0.00                        | 0.00                      | 0.00          |
| 5-Hydroxymethylfurfural      | 0.00                            | 4.46                            | 3.05                            | 1.29                             | 1.40                       | 0.00                             | 8.80                              | 21.82                       | 30.82                             | 0.00                        | 0.00                      | 4.46          |
| 1-(2-Furanyl)-1,2-ethanediol | 2.60                            | 3.98                            | 3.81                            | 2.75                             | 4.65                       | 3.18                             | 3.78                              | 4.00                        | 2.14                              | 0.00                        | 2.60                      | 3.98          |

\* Area percent of glycerol was removed as it is not reliably analyzed by the method. From the un-inoculated sample, area percent of 1-ethyl-2-hydroxymethylimidazole (51.48) was also removed.

**Table S2.** Volatile organic compounds of the wines without SO<sub>2</sub> produced using the eleven yeast strains.

| Compound                     | Peak area %*          |                       |                       |                      |                      |                      |                      |                    |                          |                  |                  | Un-inoculated |
|------------------------------|-----------------------|-----------------------|-----------------------|----------------------|----------------------|----------------------|----------------------|--------------------|--------------------------|------------------|------------------|---------------|
|                              | <i>T. delbrueckii</i> | <i>M. bicuspidata</i> | <i>M. pulcherrima</i> | <i>S. cerevisiae</i> | <i>S. cerevisiae</i> | <i>S. cerevisiae</i> | <i>S. cerevisiae</i> | <i>D. hansenii</i> | <i>L. thermotolerans</i> | <i>Z. bailii</i> | <i>H. uvarum</i> |               |
|                              | 3-16-1                | 125/14                | 11-1-7                | 15-1-552             | 53                   | PDA W 10             | PDA M 1/1            | 5-1-6              | 5-1-1                    | 24-1-25          | 26/17            |               |
| Acetaldehyde                 | 0.82                  | 0.67                  | 0.00                  | 0.94                 | 2.21                 | 0.56                 | 1.12                 | 0.00               | 0.83                     | 0.44             | 0.28             | 0.00          |
| 1-Propanol                   | 0.40                  | 0.46                  | 0.00                  | 0.60                 | 0.57                 | 0.30                 | 0.00                 | 0.00               | 0.31                     | 0.58             | 0.00             | 0.00          |
| Isobutanol                   | 0.00                  | 0.00                  | 0.18                  | 0.25                 | 0.48                 | 0.00                 | 0.00                 | 0.00               | 0.00                     | 0.00             | 0.00             | 0.00          |
| 3-Methyl-1-butanol           | 8.75                  | 13.10                 | 4.60                  | 12.89                | 16.31                | 12.85                | 10.25                | 1.54               | 9.32                     | 2.95             | 1.63             | 0.00          |
| Ethyl hexanoate              | 0.24                  | 3.39                  | 0.00                  | 0.00                 | 2.00                 | 1.65                 | 0.00                 | 0.00               | 0.09                     | 0.00             | 0.00             | 0.00          |
| Hydroxyacetone               | 0.00                  | 0.00                  | 0.35                  | 0.00                 | 0.00                 | 0.00                 | 0.00                 | 0.58               | 0.24                     | 0.38             | 0.00             | 0.00          |
| Acetoin                      | 0.00                  | 0.00                  | 0.00                  | 0.00                 | 0.85                 | 0.00                 | 0.00                 | 0.00               | 0.26                     | 0.00             | 1.43             | 0.00          |
| 1-Hexanol                    | 0.00                  | 0.27                  | 0.18                  | 0.21                 | 0.00                 | 0.26                 | 0.00                 | 1.02               | 0.30                     | 0.00             | 0.00             | 0.00          |
| Ethyl octanoate              | 0.00                  | 2.21                  | 0.00                  | 0.88                 | 0.42                 | 1.30                 | 0.43                 | 0.00               | 0.00                     | 0.00             | 0.00             | 0.00          |
| Acetic acid                  | 2.00                  | 6.03                  | 3.05                  | 6.99                 | 9.17                 | 5.49                 | 10.31                | 5.21               | 3.86                     | 6.54             | 16.25            | 3.51          |
| Furfural                     | 3.41                  | 0.40                  | 5.50                  | 0.20                 | 0.00                 | 0.00                 | 0.22                 | 8.63               | 1.81                     | 4.13             | 5.21             | 0.00          |
| 2-Hydroxyfuraneol            | 0.00                  | 0.00                  | 0.57                  | 0.00                 | 0.00                 | 0.00                 | 0.00                 | 0.86               | 0.41                     | 0.61             | 0.60             | 0.00          |
| 2,3-Butanediol               | 2.68                  | 2.19                  | 0.00                  | 3.73                 | 3.75                 | 2.04                 | 3.27                 | 0.00               | 3.20                     | 0.77             | 0.00             | 0.00          |
| 5-Methylfurfural             | 0.72                  | 0.49                  | 0.50                  | 0.35                 | 0.30                 | 0.29                 | 0.31                 | 0.85               | 0.53                     | 0.69             | 0.57             | 0.00          |
| Propylene glycol             | 0.00                  | 0.28                  | 0.00                  | 0.49                 | 0.00                 | 0.00                 | 0.19                 | 0.00               | 0.00                     | 0.00             | 0.00             | 0.00          |
| 4-Cyclopentene-1,3-dione     | 0.00                  | 0.00                  | 0.17                  | 0.00                 | 0.00                 | 0.00                 | 0.00                 | 0.32               | 0.00                     | 0.19             | 0.15             | 0.00          |
| Diethyleneglycol ethylether  | 0.00                  | 0.35                  | 0.00                  | 0.34                 | 0.00                 | 0.31                 | 0.00                 | 0.00               | 0.37                     | 0.00             | 0.00             | 0.00          |
| Ethyl decanoate              | 0.00                  | 1.80                  | 0.00                  | 0.89                 | 0.00                 | 0.75                 | 0.21                 | 0.00               | 0.00                     | 0.00             | 0.00             | 0.00          |
| 2-Furanmethanol              | 0.43                  | 0.27                  | 1.26                  | 0.22                 | 0.00                 | 0.19                 | 0.18                 | 1.99               | 0.64                     | 0.99             | 1.00             | 0.00          |
| Ethyl 9-decenoate            | 0.00                  | 0.39                  | 0.00                  | 0.18                 | 0.00                 | 0.29                 | 0.00                 | 0.00               | 0.00                     | 0.00             | 0.00             | 0.00          |
| 2-Methylthiolane             | 0.00                  | 0.00                  | 0.00                  | 0.00                 | 0.00                 | 0.00                 | 0.00                 | 0.00               | 0.25                     | 0.00             | 0.00             | 0.00          |
| Phenylethyl acetate          | 0.00                  | 1.07                  | 0.00                  | 0.73                 | 0.85                 | 0.86                 | 0.28                 | 0.00               | 0.00                     | 0.84             | 0.26             | 0.00          |
| Hexanoic acid                | 0.00                  | 0.58                  | 0.00                  | 0.38                 | 0.33                 | 0.47                 | 0.22                 | 0.00               | 0.08                     | 0.00             | 0.00             | 0.00          |
| Benzyl alcohol               | 0.00                  | 0.00                  | 0.00                  | 0.00                 | 0.00                 | 0.00                 | 0.00                 | 0.39               | 0.00                     | 0.00             | 0.00             | 0.15          |
| 2-Phenylethanol              | 13.30                 | 15.90                 | 6.93                  | 13.49                | 22.90                | 14.94                | 11.53                | 1.77               | 19.36                    | 8.15             | 4.71             | 1.47          |
| Furyl hydroxymethylketone    | 0.00                  | 0.00                  | 0.00                  | 0.18                 | 0.00                 | 0.00                 | 0.00                 | 0.85               | 0.38                     | 0.51             | 0.44             | 0.00          |
| Octanoic acid                | 0.26                  | 5.05                  | 0.00                  | 3.44                 | 0.89                 | 4.79                 | 3.31                 | 0.00               | 0.88                     | 0.00             | 0.33             | 0.14          |
| Nonanoic acid                | 0.00                  | 0.41                  | 0.00                  | 0.16                 | 0.00                 | 0.00                 | 0.00                 | 0.00               | 0.00                     | 0.00             | 0.00             | 0.00          |
| 4-Vinylguaiacol              | 0.00                  | 0.97                  | 0.00                  | 0.73                 | 1.41                 | 0.64                 | 0.77                 | 0.00               | 0.00                     | 0.00             | 0.00             | 0.00          |
| Decanoic acid                | 1.94                  | 10.97                 | 0.00                  | 6.85                 | 0.98                 | 9.18                 | 7.43                 | 0.00               | 1.09                     | 0.00             | 0.41             | 0.00          |
| Pyranone                     | 3.56                  | 0.66                  | 10.25                 | 0.91                 | 0.34                 | 0.56                 | 0.67                 | 12.14              | 3.91                     | 7.93             | 8.23             | 11.38         |
| Hydroxymaltol                | 0.35                  | 0.00                  | 0.62                  | 0.00                 | 0.00                 | 0.00                 | 0.00                 | 0.75               | 0.55                     | 0.51             | 0.55             | 0.62          |
| 9-Decenoic acid              | 1.97                  | 3.52                  | 0.00                  | 3.30                 | 0.00                 | 4.08                 | 3.52                 | 0.00               | 0.00                     | 0.00             | 0.00             | 0.00          |
| Coumaran                     | 0.00                  | 1.58                  | 0.00                  | 1.45                 | 2.53                 | 1.21                 | 1.65                 | 1.25               | 0.00                     | 0.00             | 0.00             | 0.00          |
| 5-Hydroxymethylfurfural      | 27.37                 | 1.57                  | 35.79                 | 0.48                 | 0.95                 | 0.57                 | 0.73                 | 48.93              | 14.95                    | 32.11            | 34.59            | 0.00          |
| 1-(2-Furanyl)-1,2-ethanediol | 0.00                  | 0.00                  | 2.64                  | 2.79                 | 3.38                 | 2.87                 | 4.15                 | 3.27               | 3.67                     | 3.53             | 2.83             | 0.00          |

\* Area percent of glycerol was removed as it is not reliably analyzed by the method. From the un-inoculated sample, area percent of 1-ethyl-2-hydroxymethylimidazole (59.00) was also removed.
